1 **Bariatric surgery reveals a gut-restricted TGR5 agonist that exhibits anti-diabetic effects**

2

3 Snehal N. Chaudhari<sup>1#</sup>, David A. Harris<sup>2#</sup>, Hassan Aliakbarian<sup>2</sup>, Matthew T. Henke<sup>1</sup>, Renuka  
4 Subramaniam<sup>2</sup>, Ashley H. Vernon<sup>2</sup>, Ali Tavakkoli<sup>2</sup>, Eric G. Sheu<sup>2\*</sup>, A. Sloan Devlin<sup>1\*</sup>

5

6 #Co-first author \*Co-corresponding author

7 <sup>1</sup>Department of Biological Chemistry and Molecular Pharmacology, Harvard Medical School,  
8 Boston, MA, 02115

9 <sup>2</sup>Department of Surgery, Brigham and Women's Hospital, Harvard Medical School, Boston, MA

10

11 Correspondence: [esheu@bwh.harvard.edu](mailto:esheu@bwh.harvard.edu), [sloan\\_devlin@hms.harvard.edu](mailto:sloan_devlin@hms.harvard.edu)

12

13

14

15

16

## 17 **Abstract**

18 Bariatric surgery, the most effective treatment for obesity and type 2 diabetes, is consistently  
19 associated with increased levels of the incretin hormone GLP-1 and changes in overall levels of  
20 circulating bile acids. The levels of individual bile acids in the GI tract following surgery, however,  
21 have remained largely unstudied. Using UPLC-MS-based quantification, we observed an  
22 increase in an endogenous bile acid, cholic acid-7-sulfate (CA7S), in the GI tract of both mice and  
23 humans after sleeve gastrectomy. We show that CA7S is a TGR5 agonist that induces GLP-1  
24 secretion in vitro and in vivo and that CA7S administration increases glucose tolerance in insulin-  
25 resistant mice in a GLP-1 receptor-dependent manner. CA7S remains gut-restricted, minimizing  
26 off-target effects previously observed for TGR5 agonists absorbed into circulation. By studying  
27 changes in individual metabolites following surgery, this study has revealed a naturally occurring  
28 TGR5 agonist that exerts systemic glucoregulatory effects while remaining confined to the gut.

29

## 30 **Introduction**

31 Obesity and type 2 diabetes (T2D) are medical pandemics. Bariatric surgery, in the form of Roux-  
32 en-Y gastric bypass or sleeve gastrectomy (SG), is currently the most effective and lasting  
33 treatment for obesity and related comorbidities<sup>1,2</sup>. For a majority of patients, remission is durable  
34 and lasts for years after surgery<sup>1,3</sup>. Two changes consistently observed following bariatric surgery  
35 are increased levels of GLP-1, a circulating incretin hormone, and changes in the systemic  
36 repertoire of bile acids<sup>4</sup>. Bile acids are cholesterol-derived metabolites that play crucial roles in  
37 host metabolism by acting as detergents that aid in the absorption of lipids and vitamins, and as  
38 ligands for host receptors<sup>5</sup>. Bile acids have been implicated in post-SG therapeutic benefits due  
39 to their ability to mediate signaling through the G protein-coupled bile acid receptor (GPBAR1,  
40 also known as TGR5)<sup>6</sup> and the farnesoid X receptor (FXR)<sup>7</sup>. Thus far, research efforts have  
41 focused on overall changes in the total bile acid pool or in levels of conjugated or unconjugated  
42 bile acids in circulating blood<sup>4,8</sup>. Individual bile acids, however, have different binding affinities for

43 nuclear hormone receptors (NHRs) and GPCRs, and thus unique abilities to modulate glucose  
44 homeostasis, lipid accumulation, and energy expenditure<sup>5,9</sup>. It is not sufficient, therefore, to limit  
45 analyses to whole classes of bile acids. Moreover, local activation of receptors in the intestine can  
46 affect global metabolic outcomes. In particular, GLP-1 is secreted post-prandially by  
47 enteroendocrine L cells in the lower intestine in response to activation of TGR5, a G-protein  
48 coupled receptor with a primary role in energy metabolism<sup>10</sup>. GLP-1 directly stimulates pancreatic  
49 insulin release, and both hormones then regulate metabolism systemically<sup>11</sup>. In this work, we  
50 sought to identify specific naturally occurring bile acids whose levels were increased in the gut  
51 following SG and then to investigate the role of these compounds as potential TGR5 ligands and  
52 thus regulators of glucose metabolism. We identified one bile acid, cholic acid-7-sulfate (CA7S),  
53 whose levels were increased in cecal contents and feces of mice and humans, respectively, after  
54 SG. We then determined that CA7S is a gut-restricted TGR5 agonist and GLP-1 secretagogue  
55 that increases acute glucose tolerance when administered to diet-induced obese mice.

56

## 57 **Results**

### 58 **Intestinal bile acid profiling reveals increased CA7S in mice and humans post-SG**

59 Owing to robust post-surgical metabolic benefits and favorable side-effect profile, SG is the most  
60 common bariatric surgery performed in the US<sup>12</sup>. Rodent SG models mimic the positive metabolic  
61 outcomes observed in humans and are thus suitable for studying post-surgical outcomes<sup>13</sup>. In this  
62 study, SG or sham surgery was performed on insulin-resistant, diet-induced obese (DIO) mice  
63 (Fig. 1a). SG mice displayed improved glucose tolerance and insulin sensitivity 4-5 weeks post-  
64 surgery compared to shams (Fig. 1b-e). Mice were euthanized six weeks post-surgery and their  
65 tissues were harvested. Consistent with studies involving human patients<sup>4</sup>, we observed an  
66 increase in circulating GLP-1 in SG mice (Fig. 1f). Individual bile acids that are known agonists of  
67 TGR5 have been shown to induce GLP-1 secretion in lower-intestinal L cells<sup>4,10</sup>. We therefore  
68 quantified individual bile acids in cecal contents of SG and sham mice using Ultra-high

69 Performance Liquid Chromatography-Mass Spectrometry (UPLC-MS) (Fig. 2a). We observed a  
70 significant increase in only one bile acid in cecal contents of SG mice. Based on its mass, this  
71 compound appeared to be a monosulfated metabolite of a trihydroxy bile acid. We purified this  
72 compound from pooled extracts of post-SG cecal contents using mass spectrometry-guided semi-  
73 preparative HPLC. Using NMR spectroscopy, we then identified this compound as cholic acid-7-  
74 sulfate (CA7S) (Fig. 2b,c, Supplementary figs. 1,2). This molecule is a sulfated metabolite of  
75 cholic acid (CA), which is an abundant primary bile acid in both mice and humans. Sulfation of  
76 bile acids predominantly occurs in the liver<sup>14</sup>. Consistent with this observation, we found increased  
77 levels of CA7S in the liver of SG mice (Fig. 2d). While previous studies observed an increase in  
78 the total circulating serum bile acid concentration in patients post-bariatric surgery<sup>8</sup>, we did not  
79 note a difference in total gut bile acid levels as measured in cecal contents of post-SG compared  
80 to post-sham mice (Fig. 2b). Notably, CA7S was the only bile acid detected whose levels were  
81 significantly higher in SG mouse cecal contents and livers (Supplementary figs. 3, 4).

82  
83 To determine whether CA7S concentrations were also higher in humans after surgery, we  
84 quantified bile acids in stool from patients who had undergone SG. Remarkably, even though total  
85 fecal bile acid levels were decreased in patients post-SG compared to their pre-surgery levels,  
86 fecal CA7S levels were significantly increased (Fig. 2e, Supplementary fig. 5). To our knowledge,  
87 this is the first report of a specific bile acid metabolite that is significantly increased following SG  
88 in both mice and human subjects. Similar to DIO mouse cecal contents, there was no significant  
89 difference in total bile acid concentration in feces before or after SG in these patients (Fig. 2e,  
90 Supplementary fig. 5).

91  
92 **CA7S activates TGR5 and induces GLP-1 secretion in vitro**  
93 We next sought to determine whether CA7S can activate TGR5 and thereby induce GLP-1  
94 secretion from L cells. Previous work has shown that sulfation of both natural bile acids and

95 synthetic analogs significantly alters the TGR5 agonistic activity of these compounds<sup>15</sup>. We  
96 therefore hypothesized that CA7S might possess altered TGR5 agonism compared to CA. While  
97 sulfation at C3 abolishes the TGR5 agonist activity of lithocholic acid (EC<sub>50</sub> values of 0.58 μM and  
98 >100 μM, respectively), replacement of the C24-carboxylic acid with a C24-sulfate lowers the  
99 EC<sub>50</sub> of CA, chenodeoxycholic acid, and ursodeoxycholic acid by an order of magnitude in each  
100 case<sup>15</sup>. Based on these results, we hypothesized that the C7-sulfated version of CA, CA7S, might  
101 possess significantly different TGR5 agonistic activities than CA, which is a weak agonist of TGR5  
102 (reported EC<sub>50</sub> value of 13.6 μM)<sup>15</sup>. We examined the activation of human TGR5 in human  
103 embryonic kidney cells (HEK293T) by CA7S, CA, or tauro-deoxycholic acid (TDCA), which is a  
104 naturally occurring bile acid and potent TGR5 agonist<sup>16</sup>. We found that CA7S activated human  
105 TGR5 in a dose-dependent manner and to a similar extent as TDCA. CA7S also displayed a lower  
106 EC<sub>50</sub> (0.17 μM) than CA (12.22 μM) (Fig. 2f).

107  
108 TDCA is currently one of the most potent, naturally occurring GLP-1 secretagogues known<sup>16</sup>. We  
109 observed that CA7S induced GLP-1 secretion in human intestinal L cells (NCI-H716) to a similar  
110 degree as TDCA in a dose-dependent manner, while CA had no effect on GLP-1 secretion (Fig.  
111 2g and Supplementary fig. 6a). CA7S extracted and purified directly from cecal contents of SG  
112 mice also induced GLP-1 secretion in vitro (Fig. 2h). Furthermore, siRNA-mediated knockdown  
113 of TGR5 abolished both CA7S- and TDCA-mediated secretion of GLP-1 (Fig. 2g, Supplementary  
114 fig. 6a,b). This result indicates that induction of GLP-1 secretion by CA7S requires TGR5. TGR5  
115 agonism also results in elevated intracellular calcium levels<sup>17</sup>. Consistent with this previous  
116 finding, we observed a dose-dependent increase in calcium levels in NCI-H716 cells treated with  
117 CA7S (Supplementary fig. 6c). Taken together, our results demonstrate that CA7S, a naturally  
118 occurring bile acid metabolite, is a potent TGR5 agonist and GLP-1 secretagogue.

119

120 **Acute enteral CA7S administration induces GLP-1 expression and reduces blood glucose**  
121 **in vivo**

122 We next evaluated the acute anti-diabetic effects of CA7S in vivo. DIO mice were treated with  
123 either CA7S or PBS via duodenal and rectal catheters (Fig. 3a). Administration of 1 mg of CA7S  
124 resulted in an average of 2500 pmol/mg wet mass of CA7S in cecal contents, a concentration  
125 similar to observed post-SG levels (Fig. 2b, 3b, Table 1). Consistent with our in vitro studies,  
126 CA7S-treated mice displayed increased systemic GLP-1 levels compared to PBS-treated mice  
127 within 15 minutes (Fig. 3c). Moreover, CA7S-treated mice exhibited reduced blood glucose levels  
128 and increased insulin levels compared to PBS-treated mice (Fig. 3d,e, Supplementary fig. 6d).  
129 GLP-1-producing enteroendocrine L cells are enriched in the distal compared to the proximal  
130 gut<sup>18,19</sup>. Consistent with this finding, we observed that TGR5 expression was increased in the  
131 colon, but not the terminal ileum, of CA7S-treated mice (Fig. 3f). These results suggest that in an  
132 acute setting, distal action of CA7S in the GI tract induces systemic glucose clearance and thus  
133 ameliorates hyperglycemia.

134

135 **Oral CA7S administration increases glucose tolerance in vivo**

136 To further study the anti-diabetic effects of CA7S, DIO mice were orally gavaged with CA7S at a  
137 dose of 100 mg/kg (Fig. 4a). Analysis of cecal contents 5 hours post-gavage showed an  
138 accumulation of 15,000 picomol/mg wet mass of CA7S (mean value, Fig. 4b), a concentration  
139 that is within an order of magnitude of the mean amount measured in post-SG mice. These data  
140 indicate that we had administered a physiologically relevant concentration of this metabolite.  
141 Systemic levels of GLP-1 were increased in CA7S-gavaged mice compared to PBS-treated mice  
142 5 hours post-treatment (Fig. 4c). This result is consistent with the findings from enteral  
143 administration and demonstrates that oral CA7S treatment can increase circulating GLP-1 for  
144 several hours.

145

146 We then determined the effect of CA7S on glucose tolerance over time using an oral glucose  
147 tolerance test (OGTT). DIO mice were gavaged with CA7S (100 mg/kg) or PBS and then  
148 administered an oral glucose bolus 3 hours later. CA7S treatment resulted in an increased rate  
149 of blood glucose clearance (Fig. 4d). Moreover, the total and incremental areas under the glucose  
150 versus time curves (AUC and iAUC) were significantly decreased in CA7S- compared to vehicle-  
151 treated mice (Fig. 4e). These results demonstrate that CA7S increases blood glucose clearance  
152 following oral glucose challenge, a clinically relevant test used in the diagnosis of diabetes.

153

#### 154 **Anti-diabetic effects of CA7S are largely dependent on GLP-1**

155 Because CA7S is a potent inducer of GLP-1 secretion, we sought to determine if the acute anti-  
156 diabetic effects of CA7S are dependent on GLP-1. To investigate this question, we performed  
157 lentiviral shRNA-mediated knockdown of the GLP-1 receptor (GLP-1R) in vivo. DIO mice were  
158 injected intraperitoneally with  $5 \times 10^5$  shRNA lentiviral particles targeting GLP-1R. At day 3 post-  
159 injection, expression of GLP-1R in the small intestine, heart, and stomach was significantly  
160 reduced, and importantly, the expression of GLP-1R was undetectable in the pancreas  
161 (Supplementary fig. 7a). Mice were then gavaged with CA7S (100 mg/kg) or PBS and subjected  
162 to an OGTT 3 hours post-gavage. We observed that while the glycemic curve and AUCs for the  
163 CA7S-treated animals were lower than those of the PBS-treated mice, there were no longer  
164 significant differences in these metrics in the absence of GLP-1R. These data suggest that in an  
165 acute setting, the blood glucose clearing-effects of CA7S are largely dependent on the action of  
166 GLP-1 (Fig. 4f,g).

167

#### 168 **CA7S is gut-restricted, non-toxic, and does not induce gallbladder filling**

169 While high concentrations of CA7S were observed in the intestine, this metabolite was  
170 undetectable in both circulating and portal venous blood from SG and sham-operated mice (Table  
171 1). This result suggests that CA7S is neither recycled via enterohepatic circulation nor absorbed

172 into systemic circulation. In contrast, the known endogenous TGR5 agonists TDCA and DCA are  
173 found in systemic circulation in mice<sup>9</sup>. Introduction of CA7S via enteral administration or oral  
174 gavage resulted in only minor amounts in circulating and portal venous blood (Table 1). Our  
175 findings are consistent with previous observations that sulfated bile acids, in particular 7 $\alpha$ -sulfated  
176 bile acids, are poorly absorbed in the intestine<sup>14</sup>.

177  
178 Notably, while synthetic TGR5 agonists ameliorate diabetic phenotypes<sup>20</sup>, their use as  
179 therapeutics is hampered by significant side effects resulting from their absorption into circulation  
180 <sup>20,21</sup>. In particular, systemically absorbed TGR5 agonists reduce bile secretion and induce  
181 gallbladder filling, conditions that cause bile stasis<sup>10,21</sup>. We did not observe any change in  
182 gallbladder weight in DIO mice 5 hours after oral gavage of CA7S compared to PBS control  
183 treatment (Fig. 4h). This result suggests that, in an acute setting, CA7S does not display one of  
184 the major side-effects of non-gut-restricted TGR5 agonists. Finally, CA7S does not affect the  
185 viability of Caco-2 cells at concentrations up to 15 mM (Fig. 4i), indicating that this metabolite is  
186 not toxic to human intestinal cells at physiologically relevant concentrations.

187

## 188 **Discussion**

189 By quantifying changes in individual bile acids, we found that the sulfated metabolite CA7S is  
190 increased in both the mouse GI tract and human feces following SG. We then found that CA7S is  
191 a potent TGR5 agonist that induces the secretion of the incretin hormone, GLP-1 from  
192 enteroendocrine L cells both in vitro and in vivo. In acute settings, we observed that CA7S exhibits  
193 anti-diabetic effects, including decreasing blood glucose levels and increasing glucose tolerance  
194 in insulin-resistant mice. Unlike known endogenous TGR5 agonists, CA7S is not absorbed into  
195 portal or systemic circulation. CA7S had previously been regarded as a metabolic waste product  
196 produced by the liver – a sulfated form of cholic acid that was tagged for excretion in feces<sup>14</sup>. To  
197 our knowledge, no role for CA7S as a ligand for a GPCR or NhR has been reported. Taken



198 together, our data indicate that CA7S is a signaling molecule that binds to TGR5 exclusively in  
199 the gut and thereby increases systemic levels of GLP-1.

200  
201 Owing to the significant off-target effects caused by TGR5 agonists absorbed into circulation, it  
202 has been suggested that an improved TGR5-based therapeutic for T2D would specifically activate  
203 intestinal TGR5<sup>21</sup>. This GPCR is expressed both apically and basolaterally on L cells<sup>16</sup>. TDCA has  
204 been shown to activate TGR5 and induce GLP-1 secretion when applied to L cells from both  
205 apical and basolateral directions<sup>16</sup>. These findings suggest that development of a gut-restricted  
206 TGR5 agonist could be effective in the treatment of T2D. In the setting of acute administration,  
207 we found that CA7S does not induce gallbladder filling as has been reported for synthetic TGR5  
208 agonists that enter circulating blood. Furthermore, CA7S is not toxic to human intestinal cells and  
209 is stable at physiological pHs (Supplementary fig. 7b). Additional studies are required to assess  
210 the long-term effects of CA7S on glucose tolerance and insulin sensitivity in vivo. Nonetheless,  
211 as a result of its beneficial acute metabolic effects, gut restriction, and low toxicity, CA7S could  
212 be a candidate for the development of a T2D therapeutic.

213  
214 The role that CA7S plays in the metabolic changes observed post-SG remains unknown. Due to  
215 the redundancy of sulfotransferases (SULTs), the enzymes responsible for CA7S synthesis in the  
216 the mouse liver<sup>22</sup>, knock-down of endogenous CA7S levels may be a challenging endeavor. If this  
217 obstacle could be overcome, performing SG on CA7S-depleted mice would help to reveal the  
218 contribution of this molecule to the metabolic effects of the surgery.

219  
220 More broadly, prior to this work, there were no known individual metabolites whose levels were  
221 altered by bariatric surgery that could increase blood glucose clearance. Through the  
222 identification and study of CA7S, we have uncovered a metabolite that, while restricted to the GI  
223 tract, can improve global glucose regulation.

224 **Online Methods**

225 **Animals.** Diet induced obese, male, C57Bl/6J mice were purchased from Jackson Laboratory  
226 (Bar Harbor, ME) at 11-16 weeks of age. They were housed under standard conditions in a  
227 climate-controlled environment with 12 hour light and dark cycles and reared on a high fat diet  
228 (HFD, 60% Kcal fat; RD12492; Research Diets, NJ). They were allowed to acclimate for at least  
229 1 week prior to undergoing any procedures. All animals were cared for according to guidelines  
230 set forth by the American Association for Laboratory Animal Science. All procedures were  
231 approved by the Institutional Animal Care and Use Committee.

232  
233 **Sleeve gastrectomy (SG) and sham procedures.** 11-week-old DIO mice were purchased and  
234 housed as described above. Mice were weight-matched into two groups and either underwent SG  
235 or Sham operation. SG was performed through a 1.5 cm midline laparotomy under isoflurane  
236 anesthesia. The stomach was gently dissected free from its surrounding attachments, the vessels  
237 between the spleen and stomach (short gastric vessels) were divided, and a tubular stomach was  
238 created by removing 80% of the glandular and 100% of the non-glandular stomach with a linear-  
239 cutting surgical stapler. Sham operation consisted of a similar laparotomy, stomach dissection,  
240 ligation of short gastric vessels, and manipulation of the stomach along the staple line equivalent.  
241 Mice were then individually housed thereafter to allow for monitoring of food intake, weight, and  
242 behavior. SG and Sham mice were maintained on Recovery Gel Diet (Clear H<sub>2</sub>O, Westbrook,  
243 ME) from 1 day prior through 6 days after surgery and then were restarted on HFD on the morning  
244 of post-operative day (POD) 7. Mice were sacrificed 5-7 weeks post-surgery.

245  
246 **Functional glucose testing.** After a 4 hour fast (8 am to noon), intraperitoneal glucose tolerance  
247 testing (IPGTT) and insulin tolerance testing (ITT) were performed at post-operative week 4 and  
248 5, respectively. During IPGTT, mice received 2 mg/g of intraperitoneal D-Glucose (Sigma-Aldrich,  
249 St. Louis, MO) and serum glucose levels were measured from the tail vein at 15, 30, 60, and 120

250 min with a OneTouch Glucometer (Life technologies, San Diego, CA). ITT was performed by  
251 intraperitoneal instillation of 0.6u/kg of regular human insulin (Eli Lilly and Company, Indianapolis,  
252 IN) and measurement of serum glucose levels at 15, 30, and 60 min. Baseline glucose was  
253 measured for each set prior to medication administration.

254  
255 **Body weight and food intake measurements.** Mice were individually housed and weighed daily  
256 for the first post-operative week and then twice weekly until sacrifice. Food intake was measured  
257 twice weekly and daily food intake was calculated by averaging the grams eaten per day over the  
258 preceding days. Note that food intake measurements were started on POD 10 as animals were  
259 transitioned from Gel Diet to high fat diet on the morning of POD 7.

260  
261 **Bile acid analysis.** Bile acid analyses were performed using a previously reported method<sup>23</sup>.  
262 Reagents. Stock solutions of all bile acids were prepared by dissolving the compounds in  
263 molecular biology grade DMSO (VWR International, Radnor, PA). These solutions were used to  
264 establish standard curves. CA7S was purchased from (Caymen Chemicals, Ann Arbor, MI. Cat.  
265 No. 9002532). Glyocholic acid (GCA) (Sigma) was used as the internal standard for  
266 measurements in mouse tissues. HPLC grade solvents were used for preparing and running  
267 UPLC-MS samples.

268 Extraction. Cecal, liver, and human fecal samples (approximately 50 mg each) and mouse portal  
269 veins were pre-weighed in lysis tubes containing ceramic beads (Precellys lysing kit tough micro-  
270 organism lysing VK05 tubes for cecal, fecal samples, and portal veins; tissue homogenizing  
271 CKMix tubes for liver samples; Bertin technologies, Montigny-le-Bretonneux, France). 400µL of  
272 methanol containing 10 µM internal standard (GCA) was added and the tubes were homogenized  
273 in a MagNA Lyser (6000 speed for 90 s\*2, 7000 speed for 60 s). 50 µL of mouse serum was  
274 collected in Eppendorf tubes, followed by addition of 50 µL of methanol containing 10 µM internal  
275 standard (GCA). After vortexing for 1 min, the sample was cooled to -20 °C for 20 min. All

276 methanol-extracted tissue samples were centrifuged at 4 °C for 30 min at 15,000 rpm. The  
277 supernatant was diluted 1:1 in 50% methanol/water and centrifuged again at 4 °C for 30 min at  
278 15000 rpm. The supernatant was transferred into mass spec vials and injected into the UPLC-  
279 MS.

280 UPLC-MS analysis. Samples were injected onto a Phenomenex 1.7 µm, C18 100 Å, 100 × 21  
281 mm LC column at room temperature and eluted using a 30 min gradient of 75% A to 100% B  
282 (A = water + 0.05% formic acid; B = acetone + 0.05% formic acid) at a flow rate of 0.350 mL/min.  
283 Samples were analyzed using an Agilent Technologies 1290 Infinity II UPLC system coupled  
284 online to an Agilent Technologies 6120 Quadrupole LC/MS spectrometer in negative electrospray  
285 mode with a scan range of 350–550 m/z (MSD settings: fragmentor - 250, gain - 3.00, threshold  
286 - 150, Step size - 0.10, speed (u/sec) - 743). Capillary voltage was 4500 V, drying gas temperature  
287 was 300°C, and drying gas flow was 3 L/min. Analytes were identified according to their mass  
288 and retention time. For quantification of the analytes, standard curves were obtained using known  
289 bile acids, and then each analyte was quantified based on the standard curve and normalized  
290 based on the internal standard. The limits of detection for individual bile acids were determined  
291 using commercially available standards solubilized in 1:1 MeOH/water and are as follows: CA7S,  
292 0.05 picomol/µL; α/βMCA, 0.03 picomol/µL; Tα/βMCA, 0.01 picomol/µL; CA, 0.04 picomol/µL;  
293 TCA, 0.01 picomol/µL; UDCA, 0.04 picomol/µL; TUDCA, 0.01; CDCA, 0.04 picomol/µL; TCDCA,  
294 0.01 picomol/µL; LCA, 0.03 picomol/µL; isoLCA, 0.07 picomol/µL; 3-oxo-LCA, 0.05 picomol/µL;  
295 DCA, 0.04 picomol/µL; 3-oxo-CA, 0.04 picomol/µL; 3-oxo-CDCA, 0.4 picomol/µL; 7-oxo-CDCA,  
296 0.03 picomol/µL. Note that CA7S and cholic acid-3-sulfate can be distinguished based on  
297 retention time using this UPLC-MS method.

298 Purification of CA7S. Extracted cecal contents from 11 SG mice (same shown in Fig. 1) were  
299 pooled to provide sufficient material for purification. Pooled extract was purified via MS-guided  
300 HPLC of *m/z* 487 using a Luna RP C18 semi-preparative column and water and acetonitrile with  
301 0.1% formic acid as an additive.

302 NMR spectroscopy. CA7S and purified  $m/z$  487 (<1 mg) were dissolved in 250  $\mu$ L DMSO- $d_6$ .  
303 Nuclear magnetic resonance (NMR) spectra were acquired on a Varian INOVA 500 MHz and are  
304 referenced internally according to residual solvent signals (DMSO to 2.50, HOD to 3.33).

305  
306 **Cell culture**. NCI-H716 cells and Caco-2 cells were obtained from American Type Culture  
307 Collection (Manassas, VA). HEK-293T cells were a kind gift from the Blacklow lab (BCMP, HMS).  
308 Caco-2 and HEK-293T cells were maintained in Minimum Essential Medium (MEM) with  
309 GlutaMAX and Earle's Salts (Gibco, Life Technologies, UK). NCI-H716 cells were maintained in  
310 RPMI 1640 with L-glutamine (GenClone, San Diego, CA). All cell culture media were  
311 supplemented with 10% fetal bovine serum (FBS), 100 units/ml penicillin, and 100  $\mu$ g/ml  
312 streptomycin (GenClone). Cells were grown in FBS- and antibiotic-supplemented 'complete'  
313 media at 37 °C in an atmosphere of 5% CO<sub>2</sub>.

314  
315 **In vitro bile acid treatments**. NCI-H716 cells were seeded in cell culture plates coated with  
316 Matrigel (Corning, NY. Cat. No. 356234) diluted in Hank's Balanced Salt Solution (HBSS, Gibco)  
317 according to manufacturer's instructions. The cells were allowed to grow for 2 days in complete  
318 RPMI media. On the day of the treatment, cells were rinsed gently with low serum (0.5% FBS)  
319 RPMI 1640 medium without antibiotics. Bile acids cholic acid-7-sulfate (CA7S), cholic acid (CA)  
320 (Sigma) and taurodeoxycholic acid (TDCA) (Sigma) were diluted in dimethyl sulfoxide (DMSO,  
321 VWR International) and added to cells in the low serum media (0.5% FBS, RPMI 1640) without  
322 antibiotics. The concentration of DMSO was kept constant throughout the treatments and used  
323 as a negative control. Cells were incubated at 37°C in an atmosphere of 5% CO<sub>2</sub> for 2 hours. After  
324 the incubation period, cell culture media was collected in Eppendorf tubes containing 1%  
325 trifluoroacetic acid (TFA, Sigma) in sterile purified water (GenClone) to make a final TFA  
326 concentration of 0.1% and frozen at -80 °C for further GLP-1 measurements. Cells on cell culture  
327 plates were placed on ice and gently washed with PBS (GenClone). Cells used for GLP-1

328 measurements were treated with ice-cold cell lysis solution of 1% TFA, 1N hydrochloric acid, 5%  
329 formic acid, and 1% NaCl (all from Sigma), scraped off of the Matrigel coating, and collected in  
330 lysing tubes with ceramic beads (Precellys lysing kit tough micro-organism lysing VK05 tubes).  
331 For calcium measurements, PBS was added to cells, and were collected in lysing tubes containing  
332 ceramic beads (Precellys lysing kit tough micro-organism lysing VK05 tubes). Cells  
333 were thereafter lysed in a MagNA Lyser and stored at -80 °C for further analysis. Cells used for  
334 RNA extraction were treated with TRIzol (Ambion, Life Technologies, Thermo Fisher Scientific,  
335 Waltham, MA) and stored at -80 °C for further analysis.

336  
337 **GLP-1 and Insulin measurements.** Total GLP-1 peptide measurements were performed using  
338 the GLP-1 EIA Kit (Sigma, Cat. No. RAB0201) and total insulin levels were measured using the  
339 Mouse Ins1/Insulin-1 ELISA kit (Sigma, Cat. No. RAB0817) according to manufacturer's  
340 instructions. Mouse serum samples, NCI-H716 cell lysates, and cell culture media samples were  
341 stored at -80 °C and thawed on ice prior to performance ELISA assay. 20 µl of mouse serum  
342 samples were used directly in the GLP-1 ELISA assay, while 50 µl of mouse serum samples were  
343 used directly in the Insulin ELISA assay. Cell culture media were centrifuged at 12000 rpm, and  
344 the supernatant was directly used in the GLP-1 ELISA assay. Cell lysates were subjected to  
345 peptide purification using Sep Pak C18 Classic columns (Waters Corporation, Milford, MA). The  
346 column was pretreated with a solution of 0.1% TFA in 80% isopropyl alcohol (EMD Millipore) and  
347 equilibrated with 0.1% TFA in water. Cell lysates were loaded onto the column and washed with  
348 0.1% TFA in 80% isopropyl alcohol. The peptides were eluted in 0.1% TFA in water. The eluate  
349 was concentrated by drying under vacuum and resuspended in 0.1% TFA in water. Water was  
350 used as 'blank' reading for serum GLP-1 ELISA, while 0.1% TFA in water was used as 'blank' for  
351 cell culture media and purified cell lysate ELISAs. Excess samples were stored at -80°C for later  
352 analyses. Total GLP-1 amounts in the cell culture media (secreted) and cell lysates were

353 calculated using a standard curve provided in the EIA kit. Percentage GLP-1 secretion was  
354 calculated as follows:

355  $\% \text{ GLP-1 secretion} = \frac{\text{total GLP-1 secreted (media)}}{\text{total GLP-1 secreted (media)} + \text{total GLP-1}}$   
356  $\text{in cell lysates)} * 100$ . Relative GLP-1 secretion was calculated compared to DMSO control.

357

358 **Plasmids and transient transfections.** Human TGR5 was cloned using cDNA from human  
359 Caco-2 cells as template and a forward primer with an *EcoRI* restriction-site (5'-  
360 CGGAATTCGCACTTGGTCCTTGTGCTCT-3') and a reverse primer with a *XhoI*-site (5'-  
361 GTCTCGAGTTAGTTCAAGTCCAGGTCGA-3'). The PCR product was cloned into the pCDNA  
362 3.1+ plasmid (Promega Corporation, Madison, WI) and transfected at a concentration of 0.4  $\mu\text{g/ml}$   
363 of media. For luciferase reporter assays for TGR5 activation, the pGL4.29[luc2P/CRE/Hygro]  
364 plasmid (Promega Corporation), and the pGL4.74[hRluc/CMV] plasmid (Promega Corporation)  
365 were used at concentration of 2  $\mu\text{g/ml}$  and 0.05  $\mu\text{g/ml}$  of media respectively. All plasmids were  
366 transfected using Opti-MEM (Gibco) and Lipofectamine 2000 (Invitrogen, Life Technologies,  
367 Grand Island, NY, USA) according to manufacturer's instructions. Plasmid transfection were  
368 performed in antibiotic-free media (MEM for HEK293T and RPMI for Matrigel-attached NCI-H716  
369 cells) with 10% FBS. After overnight incubation, bile acids were added in complete media and  
370 incubated overnight. Cells were harvested the next day for luciferase assay. TGR5 siRNA (Santa  
371 Cruz Biotechnology, Dallas, TX) and negative siRNA (Ambion) transfection was performed using  
372 Opti-MEM and Lipofectamine 2000 according to manufacturer's instructions. After siRNA  
373 transfection, cells were incubated in antibiotic- and serum-free media (RPMI for Matrigel-attached  
374 NCI-H716 cells) for 24 hours. The next day, the media was replaced by complete media and  
375 incubated overnight. Bile acids were added 48 hours post-siRNA transfection in complete media  
376 and incubated overnight. Cells were harvested the next day for luciferase assay or RNA  
377 extraction.

378



379 **Luciferase reporter assay.** Luminescence was measured using the Dual-Luciferase Reporter  
380 Assay System (Promega Corporation) according to manufacturer's instructions. Cells were  
381 washed gently with PBS and lysed in PLB from the kit. Matrigel-attached cells were scraped in  
382 PLB. Luminescence was measured using the SpectraMax M5 plate reader (Molecular Devices,  
383 San Jose, CA) at the ICCB-Longwood Screening Facility at Harvard Medical School.  
384 Luminescence was normalized to *Renilla* luciferase activity and percentage relative luminescence  
385 was calculated compared to DMSO control.

386  
387 **Calcium measurement.** CA7S-treated NCI-H716 cells collected in PBS were used to measure  
388 intracellular calcium using the Calcium Assay Kit (Fluorometric) (Abcam, UK). Cell lysates were  
389 centrifuged at 12000 rpm, and the supernatant was directly used in the calcium assay according  
390 to manufacturer's instructions. Fluorescence was measured using the SpectraMax M5 plate  
391 reader (Molecular Devices, San Jose, CA) at the ICCB-Longwood Screening Facility at HMS.  
392 Percentage relative fluorescence was calculated compared to DMSO control.

393  
394 **Cell viability assay.** Caco-2 cells were treated with CA7S diluted in DMSO in complete MEM  
395 media. The concentration of DMSO was kept constant and used as a negative control. Cells were  
396 incubated with CA7S overnight at 37 °C in an atmosphere of 5% CO<sub>2</sub>. The next day, cells were  
397 treated with 0.25% trypsin in HBSS (GenClone) for 10 min at 37°C. Cell viability was measured  
398 in Countess II automated cell counter (Invitrogen). Percentage relative viability was calculated  
399 compared to DMSO control.

400  
401 **pH stability test.** Stability of CA7S in physiological pH's was determined using the Waters pH  
402 stability test. Briefly, buffers of pH 1 (0.1M HCl), pH7.4 (PBS) and pH 9 (a 10 mM solution of  
403 ammonium formate adjusted to pH 9 with ammonium hydroxide) (all from Sigma) were prepared.  
404 CA7S was incubated in the pH buffers overnight at 37 °C with gentle shaking (50 rpm). The next



405 day, the CA7S solution was diluted in methanol, transferred into mass spec vials and injected into  
406 the UPLC-MS.

407  
408 **RNA extraction and qPCR.** Cells frozen in TRIzol (Ambion) were collected in RNase-free  
409 Eppendorf tubes and vortexed for 30 seconds. Tissues were collected in Precellys tubes with  
410 ceramic beads and TRIzol, followed by homogenization in a MagNA Lyser (Roche, Switzerland).  
411 Tubes were kept on ice whenever possible. Chloroform was added (200µl chloroform/1ml TRIzol)  
412 and vortexed for 30 seconds. Tubes were centrifuged at 12,000 rpm for 15 min at 4 °C. The clear  
413 top layer was transferred to new RNase-free Eppendorf tubes containing 2-propanol and inverted  
414 to mix (500µl 2-propanol/1ml TRIzol). Tubes were centrifuged at 12,000 rpm for 10 min at 4 °C.  
415 The pellet was washed with 70% EtOH and centrifuged at 14,000rpm for 5 minutes at 4 °C. The  
416 RNA pellet was air-dried and resuspended in RNase-free H<sub>2</sub>O (GenClone). cDNA synthesis was  
417 performed using the High Capacity cDNA Reverse Transcription Kit (Applied Biosystems,  
418 Invitrogen, Foster City, CA). qPCR was performed using the Lightcycler 480 SYBR Green I Mater  
419 (Roche, Switzerland) in a 384-well format using a LightCycler 480 System (Roche) at the ICCB-  
420 Longwood Screening Facility at Harvard Medical School. Cq values above 45 were considered  
421 as not detected (n.d.). The  $2^{-\Delta\Delta C_t}$  method was used to calculate the relative change in gene  
422 expression. Human *TGR5* gene expression were normalized to the human *HPRT1* (*HGPRT*).  
423 Mouse *GLP-1R* gene expression was normalized to 18S. Primer sequences were:

424 human *TGR5*: Forward: 5'-CCTAGGAAGTGCCAGTGCAG-3', Reverse: 5'-  
425 CTTGGGTGGTAGGCAATGCT-3'; human *HGPRT*: Forward: 5'-  
426 CCTGGCGTCGTGATTAGTGA-3', Reverse: 5' CGAGCAAGACGTTTCAGTCCT-3'; mouse *GLP-*  
427 *1R*: Forward: 5'- AGGGCTTGATGGTGGCTATC -3', Reverse: 5'-  
428 GGACACTTGAGGGGCTTCAT -3'; mouse 18S: Forward: 5'ATTGGAGCTGGAATTACCGC-3',  
429 Reverse: 5'CGGCTACCACATCCAAGGAA-3'.

430

431 **In vivo enteral treatment with CA7S.** 13-week-old male C57Bl/6J mice were purchased,  
432 acclimated, and housed as above. They were weight matched into two groups ( $p=0.88$ ). After an  
433 overnight fast (17:00 to 0800), mice received either CA7S or PBS via direct duodenal and rectal  
434 administration. The optimal, physiologic dose of CA7S was extrapolated from the average pmol  
435 concentration of CA7S found in cecal samples from SG animals (average of 3000 pmol/mg of  
436 stool with 500 mg of stool per animal corresponds to 0.75 mg of CA7S per cecum).  
437 Under isoflurane general anesthesia, 0.25 mg and 0.75 mg of CA7S in PBS (pH 7.2) was  
438 delivered by slow infusion (5 min) antegrade into the duodenum and retrograde into the rectum,  
439 respectively. The total volume of instillation was 2 mL (0.5 mg CA7S/mL). Control animals  
440 received similar volumes of PBS alone. 15 min post infusion, serum glucose was measured via  
441 tail vein followed by whole blood collection via cardiac puncture into K+EDTA tubes containing  
442 DPPIV inhibitor (Merck Millipore, Billerica, MA), Perfablox (Sigma), and apoprotinin (Sigma).  
443 Organs were harvested for analysis. In order to account for changes in fasting times and hormonal  
444 diurnal rhythms, this experiment was carried out on four consecutive days such that only four  
445 mice were tested per day.

446  
447 **In vivo CA7S gavage.** 16-week-old DIO mice were purchased and housed as described above.  
448 Mice were gavaged orally with 100 mg/kg CA7S from 20 mg/mL solution, or equivalent volume of  
449 PBS using 20G x 38mm gavage needle. 5 hours after CA7S/PBS administration, whole blood and  
450 intestinal segments were collected.

451  
452 **In vivo CA7S and OGTT.** Age matched, DIO mice were kept on HFD and their blood glucose  
453 levels were monitored until average fasting glucose levels were  $>160$  mg/dL. Animals were fasted  
454 for 4 hours on the day of the experiment. Mice were matched into two groups based on fasting  
455 glucose levels and received either 100 mg/kg CA7S from a 20 mg/ml solution or an equivalent  
456 volume of PBS by oral gavage. Three hours later, an OGTT was performed using an oral gavage

457 of 2 mg/g oral D-glucose (Sigma-Aldrich, St. Louis, MO). Blood glucose levels were measured at  
458 baseline and at minutes 15, 30, 60 and 120 with a OneTouch glucometer.

459  
460 **Lentiviral IP injection.** GLP-1R shRNA-containing lentiviral particles (LVP) were purchased from  
461 the MISSION TRC library (Sigma-Aldrich, St. Louis, MO). LVPs containing a mixture of three GLP-  
462 1R shRNA plasmid clones (TRCN0000004629, TRCN0000004630, and TRCN0000004633) were  
463 purchased, stored at -80 °C, and thawed on ice before use. DIO mice were maintained on a HFD  
464 until average fasting glucose >160 mg/dL in a BL2 facility. Under sterile conditions, mice were  
465 injected intraperitoneally with 0.2 ml of  $5 \times 10^5$  GLP-1R shRNA LVPs with a 27G needle<sup>24,25</sup>. 72  
466 hours after LVP injection, mice underwent CA7S/PBS gavage followed by OGTT as above. After  
467 the OGTT was completed, mice were sacrificed and their tissues were harvested. GLP-1R knock-  
468 down efficiency was measured in tissues by qPCR as described above.

469  
470 **Human stool collection.** After obtaining institutional review board approval, we prospectively  
471 collected stool specimen from obese human subjects undergoing SG. Pre-operative stool  
472 specimen were collected on the day of surgery and post-operative stool specimen were obtained  
473 from post-operative day 14 to 99 (mode 15 days; median 36 days). Specimens were snap frozen  
474 in liquid nitrogen and stored at -80 °C until bile acid analysis was performed (as above).

475

476

477 **Acknowledgements**

478 We thank members of the Devlin, Sheu, Clardy, and Banks labs for helpful discussions and  
479 advice. We would like to acknowledge the Blacklow and Kruse labs for help with equipment and  
480 reagents, and the BWH mouse facility. We are grateful to the human patients who participated in  
481 this study. This work was supported by a KL2 award from Harvard Catalyst (4KI2TR001100-04)  
482 (E.G.S.), a pilot grant from Boston Area Diabetes and Endocrinology Research Center (BADERC)  
483 (NIH/NIDDK P30 DK057521) (E.G.S.), an NIH MIRA grant (R35 GM128618) (A.S.D.), a Blavatnik  
484 Biomedical Accelerator at Harvard University grant (A.S.D.), an American Heart Association  
485 Postdoctoral Fellowship (S.N.C.), an American College of Surgeons fellowship (D.A.H.), and an  
486 NIH T32 training grant (D.A.H.).

487

488 **Author contributions**

489 A.S.D., E.G.S., S.N.C., and D.A.H. conceived the project and designed the experiments. S.N.C.  
490 performed the cell culture experiments, bile acid profiling, and transcriptional analyses and  
491 hormone quantifications on mouse tissues and blood. D.A.H. performed the surgeries and the  
492 enteral administration in vivo experiments. H.A. and R.S. performed the gavages, OGTTs, and  
493 the lentiviral injection experiments. M.T.H. performed NMR analyses. A.H.V. collected and  
494 provided the human samples. S.N.C., D.A.H., E.G.S., and A.S.D. wrote the manuscript. A.T.  
495 provided feedback and reviewed the manuscript. All authors edited and contributed to the critical  
496 review of the manuscript.

497

498 **Competing interests**

499 CA7S is a subject of provisional patents held by HMS and BWH on which S.N.C., D.A.H.,  
500 E.G.S., and A.S.D. are inventors. A.S.D. is a consultant for Kintai Therapeutics and HP Hood.  
501 E.G.S. was previously on the scientific advisory board of Kitotech, Inc.

502

### 503 **Data availability statement**

504 All data generated or analyzed during this study are included in this article and its supplementary  
505 information files. In addition, numerical values for levels of individual bile acids shown as individual  
506 data points in Figure 2 and Supplementary Figures 3, 4, and 5 are available from the  
507 corresponding author upon reasonable request.

508

### 509 **Code availability statement**

510 No custom code or mathematical algorithms were used in this study.

511

### 512 **References**

- 513 1. Batterham, R. L. & Cummings, D. E. Mechanisms of Diabetes Improvement Following  
514 Bariatric/Metabolic Surgery. *Diabetes Care* **39**, 893–901 (2016).
- 515 2. Gloy, V. L. *et al.* Bariatric surgery versus non-surgical treatment for obesity: a systematic  
516 review and meta-analysis of randomised controlled trials. *BMJ* **347**, f5934–f5934 (2013).
- 517 3. Abbasi, J. Unveiling the ‘Magic’ of Diabetes Remission After Weight-Loss Surgery. *JAMA*  
518 **317**, 571–574 (2017).
- 519 4. Kaska, L., Sledzinski, T., Chomiczewska, A., Dettlaff-Pokora, A. & Swierczynski, J.  
520 Improved glucose metabolism following bariatric surgery is associated with increased  
521 circulating bile acid concentrations and remodeling of the gut microbiome. *World J.*  
522 *Gastroenterol.* **22**, 8698–8719 (2016).
- 523 5. Fiorucci, S. & Distrutti, E. Bile Acid-Activated Receptors, Intestinal Microbiota, and the  
524 Treatment of Metabolic Disorders. *Trends Mol Med* **21**, 702–714 (2015).
- 525 6. McGavigan, A. K. *et al.* TGR5 contributes to glucoregulatory improvements after vertical  
526 sleeve gastrectomy in mice. *Gut* **66**, 226–234 (2017).
- 527 7. Ryan, K. K. *et al.* FXR is a molecular target for the effects of vertical sleeve gastrectomy.  
528 *Nature* **509**, 183–188 (2014).
- 529 8. Patti, M.-E. *et al.* Serum bile acids are higher in humans with prior gastric bypass:  
530 potential contribution to improved glucose and lipid metabolism. *Obesity (Silver Spring)*  
531 **17**, 1671–1677 (2009).
- 532 9. Sayin, S. I. *et al.* Gut microbiota regulates bile acid metabolism by reducing the levels of  
533 tauro-beta-muricholic acid, a naturally occurring FXR antagonist. *Cell Metab.* **17**, 225–  
534 235 (2013).
- 535 10. Duboc, H., Taché, Y. & Hofmann, A. F. The bile acid TGR5 membrane receptor: from  
536 basic research to clinical application. *Dig Liver Dis* **46**, 302–312 (2014).
- 537 11. Madsbad, S. The role of glucagon-like peptide-1 impairment in obesity and potential  
538 therapeutic implications. *Diabetes Obes Metab* **16**, 9–21 (2014).
- 539 12. Khorgami, Z. *et al.* Trends in utilization of bariatric surgery, 2010-2014: sleeve  
540 gastrectomy dominates. *Surg Obes Relat Dis* **13**, 774–778 (2017).
- 541 13. Lutz, T. A. & Bueter, M. The Use of Rat and Mouse Models in Bariatric Surgery  
542 Experiments. *Front Nutr* **3**, 25 (2016).

- 543 14. Alnouti, Y. Bile Acid sulfation: a pathway of bile acid elimination and detoxification.  
544 *Toxicol. Sci.* **108**, 225–246 (2009).
- 545 15. Sato, H. *et al.* Novel Potent and Selective Bile Acid Derivatives as TGR5 Agonists:  
546 Biological Screening, Structure–Activity Relationships, and Molecular Modeling Studies.  
547 *Journal of Medicinal Chemistry* **51**, 1831–1841 (2008).
- 548 16. Brighton, C. A. *et al.* Bile Acids Trigger GLP-1 Release Predominantly by Accessing  
549 Basolaterally Located G Protein-Coupled Bile Acid Receptors. *Endocrinology* **156**, 3961–  
550 3970 (2015).
- 551 17. Kuhre, R. E. *et al.* Peptide production and secretion in GLUTag, NCI-H716, and STC-1  
552 cells: a comparison to native L-cells. *Journal of Molecular Endocrinology* **56**, 201–211  
553 (2016).
- 554 18. Eissele, R. *et al.* Glucagon-like peptide-1 cells in the gastrointestinal tract and pancreas  
555 of rat, pig and man. *Eur. J. Clin. Invest.* **22**, 283–291 (1992).
- 556 19. Harach, T. *et al.* TGR5 potentiates GLP-1 secretion in response to anionic exchange  
557 resins. *Sci Rep* **2**, 430 (2012).
- 558 20. Hodge, R. J. & Nunez, D. J. Therapeutic potential of Takeda-G-protein-receptor-5 (TGR5)  
559 agonists. Hope or hype? *Diabetes Obes Metab* **18**, 439–443 (2016).
- 560 21. Cao, H. *et al.* Intestinally-targeted TGR5 agonists equipped with quaternary ammonium  
561 have an improved hypoglycemic effect and reduced gallbladder filling effect. *Sci Rep* **6**,  
562 28676 (2016).
- 563 22. Dawson, P. A. & Setchell, K. D. R. Will the real bile acid sulfotransferase please stand  
564 up? Identification of Sult2a8 as a major hepatic bile acid sulfonating enzyme in mice. *J.*  
565 *Lipid Res.* **58**, 1033–1035 (2017).
- 566 23. Yao, L. *et al.* A selective gut bacterial bile salt hydrolase alters host metabolism. *eLife* **7**,  
567 675 (2018).
- 568 24. Tiscornia, G., Singer, O., Ikawa, M. & Verma, I. M. A general method for gene knockdown  
569 in mice by using lentiviral vectors expressing small interfering RNA. *PNAS* **100**, 1844–  
570 1848 (2003).
- 571 25. Blosser, W. *et al.* A method to assess target gene involvement in angiogenesis in vitro  
572 and in vivo using lentiviral vectors expressing shRNA. *PLOS ONE* **9**, e96036 (2014).
- 573
- 574

575

Fig. 1

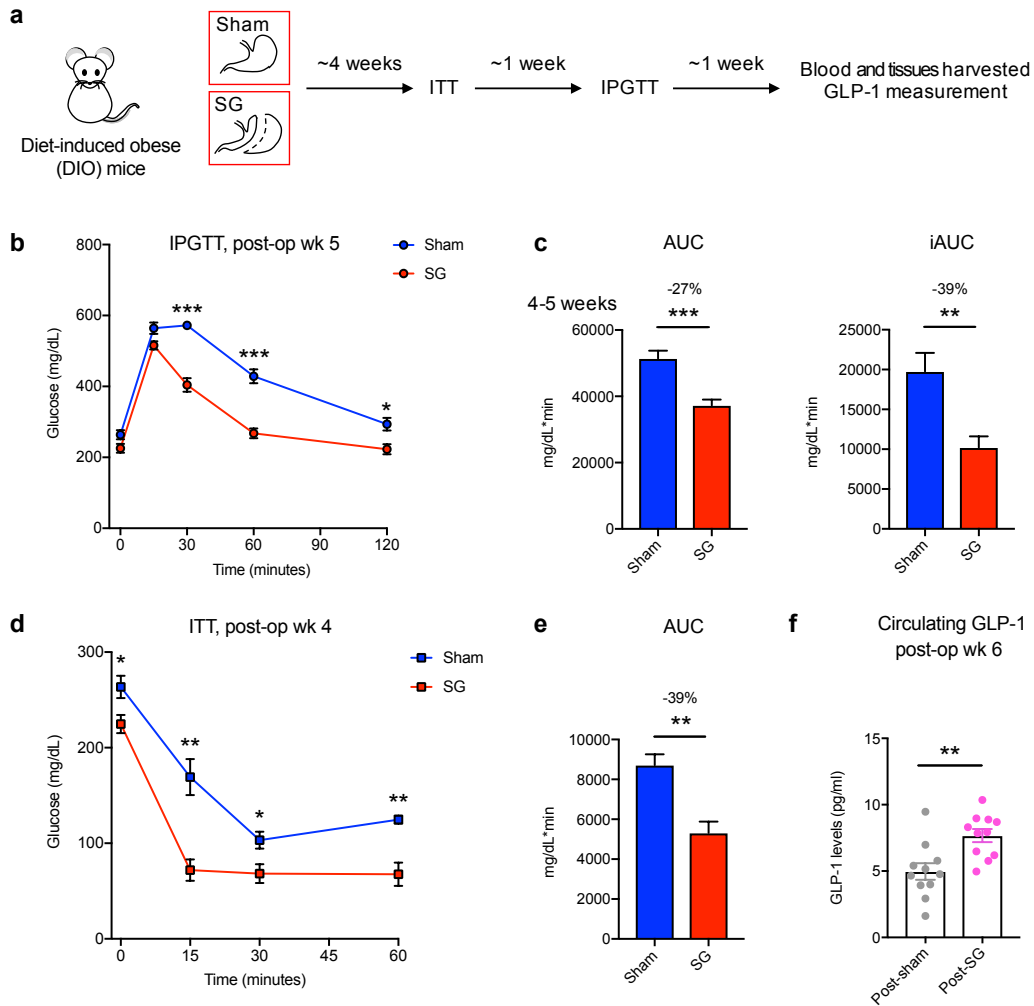

576

577 **Figure 1. DIO mice display improved glucose tolerance and insulin sensitivity following**

578 **SG**

579 **a**, Schematic of surgical interventions and post-operative assessments. Sleeve gastrectomy (SG)

580 or sham surgery was performed on diet-induced obese (DIO) mice, followed by an insulin

581 tolerance test (ITT) ~4 weeks post-op and then intraperitoneal glucose tolerance test (IPGTT) ~5

582 weeks post-op. Blood and tissues were harvested ~6 weeks post-op. **b**, Glycemic curves during

583 IPGTT (SG, n=7; sham, n=6, 30 min \*\*\* $p=5.91 \times 10^{-6}$ , 60 min \*\*\* $p=4.34 \times 10^{-5}$ , 120 min \* $p=0.012$ ,

584 Student's t test). **c**, Corresponding area under the blood glucose curve (AUC) and incremental

585 area under the curve (iAUC) were reduced in SG- compared to sham-operated mice. (AUC \*\*\* $p=$

586 0.0004, iAUC  $**p=0.006$ , Student's *t* test). **d**, Glycemic curves during ITT (SG, *n*=4; sham, *n*=4,  
 587 0 min  $*p=0.042$ , 15 min  $**p=0.0043$ , 30 min  $*p=0.038$ , 60 min  $**p=0.0045$ , Student's *t* test). **e**,  
 588 Corresponding area under the blood glucose curve (AUC) was reduced in SG- compared to  
 589 sham-operated mice (AUC  $**p=0.005$ , Student's *t* test). **f**, GLP-1 levels were increased in mice  
 590 post-SG compared to post-sham (*n*=11 per group,  $**p=0.003$ , Welch's *t* test). All data are  
 591 presented as mean  $\pm$  SEM.  
 592

**Fig. 2**

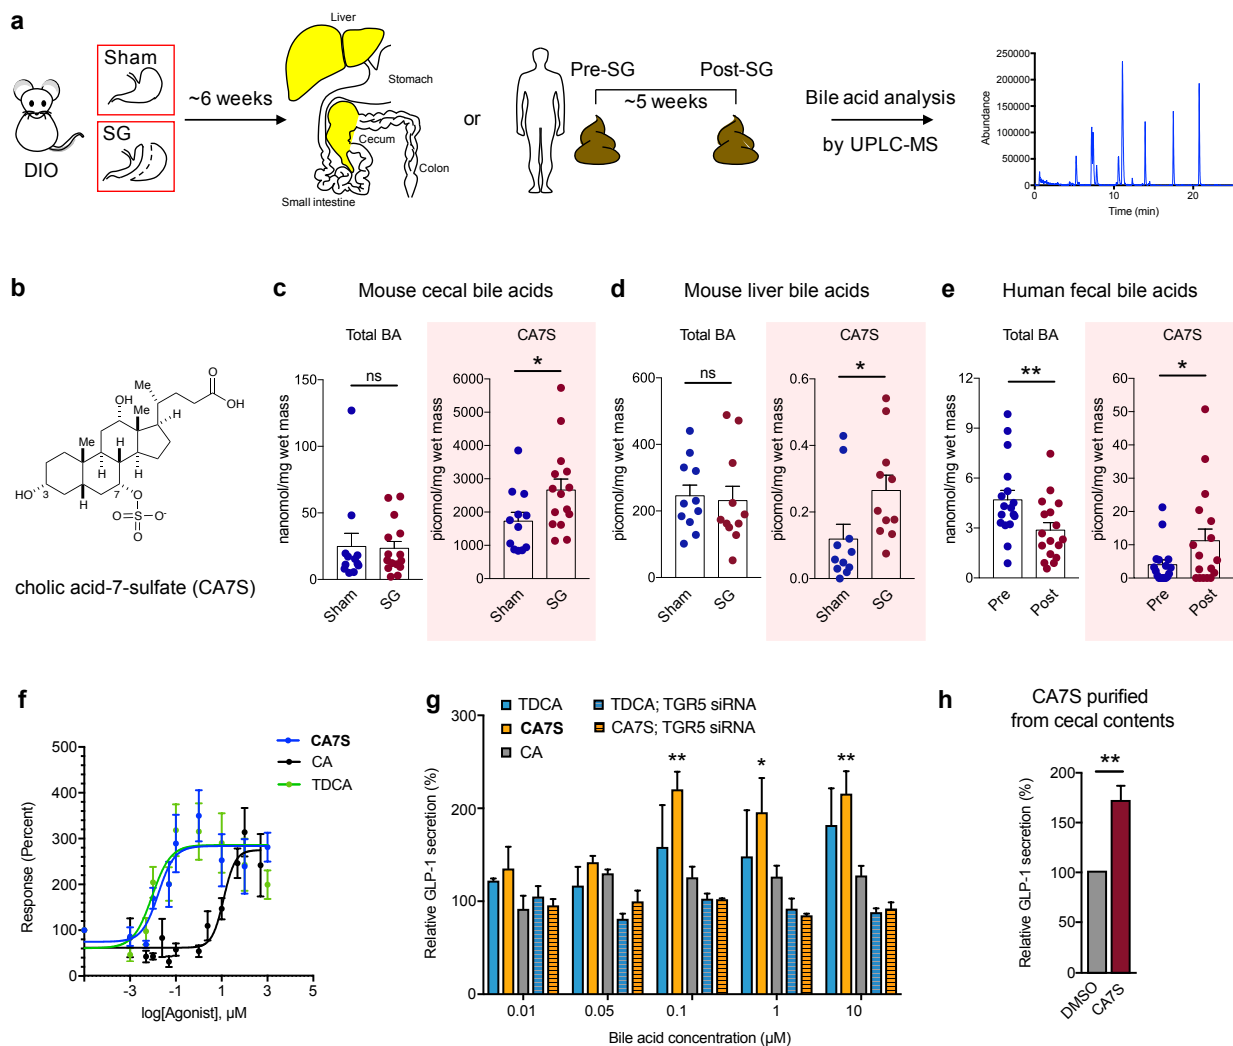

593



594 **Figure 2. Cholic acid-7-sulfate (CA7S), a bile acid metabolite increased in mice and humans**  
595 **following SG, is a TGR5 agonist and induces GLP-1 secretion in vitro**  
596 **a**, Schematic of sample collection followed by bile acid profiling using UPLC-MS. For mice, livers  
597 and cecal contents were collected from sham or SG mice 6 weeks post-op. For humans, fecal  
598 samples were collected pre-op and ~5 weeks post-op (median 36 days after surgery). **b**, Structure  
599 of CA7S. **c**, CA7S was increased in cecal contents of SG mice, while total bile acid concentrations  
600 did not differ between SG and sham mice (sham, n=12, SG, n=15, \* $p=0.037$ ,  $p=0.9$ , ns=not  
601 significant, Welch's t test). Note that 1 picomol bile acid/mg wet mass is approximately equivalent  
602 to 1  $\mu\text{M}$ . **d**, CA7S was increased in livers of SG mice (n=11 per group, \* $p=0.033$ ,  $p=0.546$ , ns=not  
603 significant, Welch's t test). **e**, CA7S in human feces was increased post-SG compared to pre-  
604 surgery (n=17 patients, \* $p=0.015$ , \*\* $p=0.001$ , paired t test). **f**, Dose response curves for human  
605 TGR5 activation in HEK293T cells overexpressing human TGR5 for CA7S, TDCA, CA ( $\geq 3$   
606 biological replicates per condition). **g**, CA7S-induced secretion of GLP-1 in NCI-H716 cells  
607 compared to both CA and the known TGR5 agonist, TDCA. siRNA-mediated knockdown of TGR5  
608 abolished GLP-1 secretion ( $\geq 3$  biological replicates per condition, 0.1 $\mu\text{M}$  \*\* $p=0.008$ , 1 $\mu\text{M}$   
609 \* $p=0.030$ , 10 $\mu\text{M}$  \*\* $p=0.002$ , one-way ANOVA followed by Dunnett's multiple comparisons test).  
610 **h**, CA7S (500  $\mu\text{M}$ ) purified from SG mouse cecal contents induced secretion of GLP-1 in NCI-  
611 H716 cells compared to DMSO control (\*\* $p=0.001$ , Welch's t test). All data are presented as mean  
612  $\pm$  SEM.

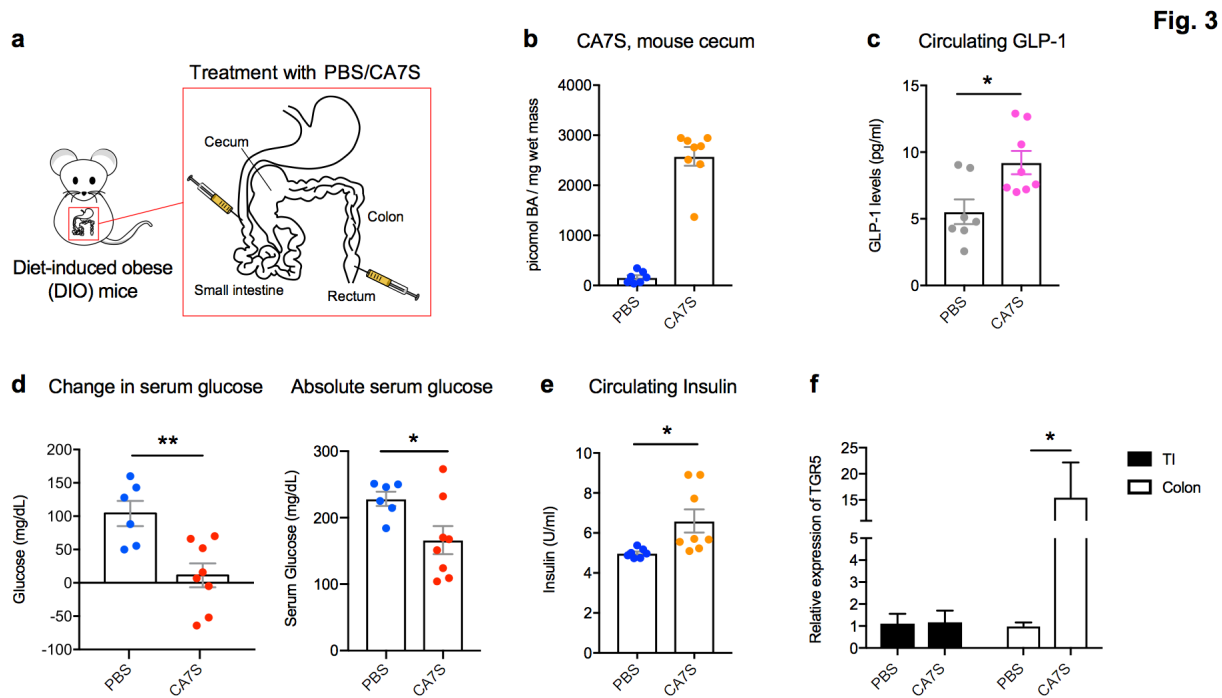

613  
 614 **Figure 3. Acute CA7S administration induces GLP-1 and reduces serum glucose levels in**  
 615 **vivo**  
 616 **a**, Schematic of acute treatment wherein anesthetized DIO mice were treated with PBS or CA7S  
 617 via duodenal and rectal catheters. **b**, Concentration of CA7S in mouse cecum 15 minutes after  
 618 treatment with PBS or CA7S (PBS, n=7; CA7S, n=8 mice per group). **c-e**, CA7S-treated mice  
 619 displayed increased GLP-1 (**c**), reduced blood glucose levels (**d**), and increased blood insulin  
 620 levels (**e**) compared to PBS-treated mice. (For **c** and **e**, PBS, n=7; CA7S, n=8 mice per group, (**c**)  
 621 \* $p=0.012$ , (**e**) \* $p=0.023$ , Welch's t test. For **d**, PBS, n=6; CA7S, n=8 mice per group, \*\* $p=0.0043$ ,  
 622 \* $p=0.033$ , Student's t test). **f**, CA7S treatment in the intestine induced TGR5 expression in the  
 623 colon but not in the terminal ileum (TI) (\* $p=0.035$ , Welch's t test). All data are presented as mean  
 624  $\pm$  SEM.

**Fig. 4**

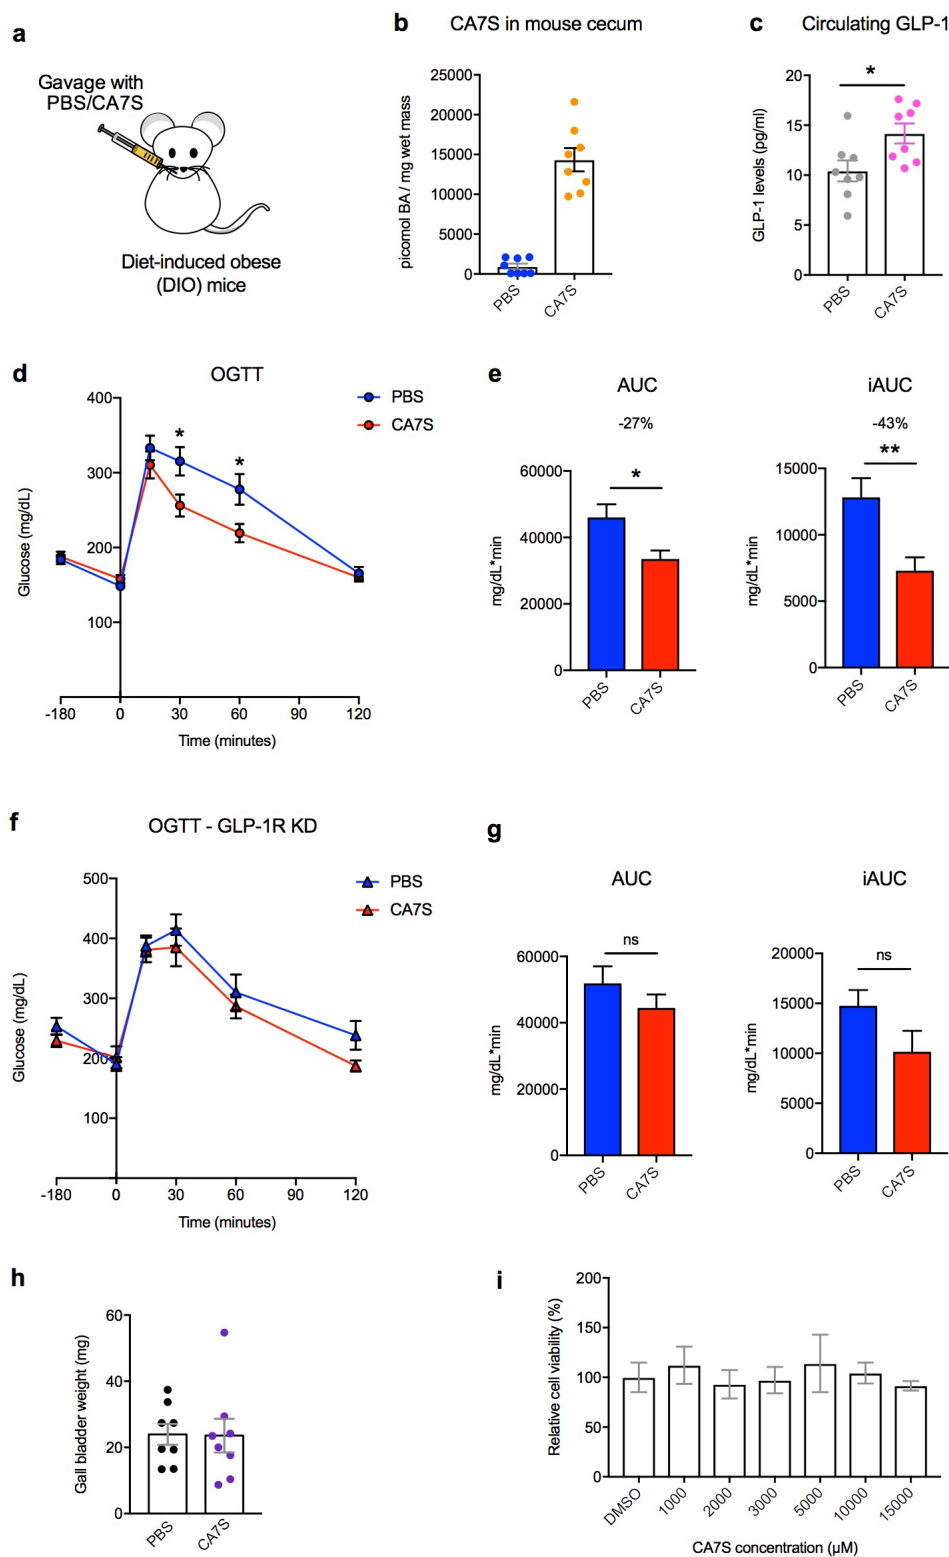

625

626 **Figure 4. CA7S gavage induces GLP-1 and improves glucose tolerance in vivo via GLP-1R**

627 **a**, Schematic of treatment of DIO mice with either PBS or CA7S via oral gavage. **b**, Concentration  
628 of CA7S in mouse cecum 5 hours after PBS or CA7S gavage. **c**, CA7S mice displayed increased  
629 GLP-1 levels 5 hours post-gavage (For **b** and **c**,  $n=8$  mice per group,  $*p=0.021$ , Welch's t test).  
630 **d,e**, DIO mice treated with CA7S (100 mg/kg) displayed increased glucose tolerance compared  
631 to vehicle-treated mice 3 hours post-gavage as determined by an oral glucose tolerance test  
632 (OGTT) ( $n=11$  mice per group). **d**, Glycemic curves during OGTT ( $*p=0.023$ , Student's t test). **e**,  
633 Corresponding blood glucose AUC and iAUC were significantly reduced in CA7S-treated mice  
634 (AUC  $*p=0.011$ , iAUC  $**p=0.004$ , Student's t test). **f,g**, On day 3 after treatment with lentiviral  
635 shRNA targeting GLP-1 receptor (GLP-1R), CA7S (100 mg/kg) or PBS was administered, and 3  
636 hours later, an OGTT was performed ( $n=7$  mice per group). **f**, Glycemic curves during OGTT (ns  
637 = not significant, 30 min  $p=0.49$ , 60 min  $p=0.53$ , 120 min  $p=0.07$ , Student's t test). **g**,  
638 Corresponding blood glucose AUC and iAUC were not significantly different in CA7S- or PBS-  
639 treated mice in which the GLP-1R had been knocked down (ns = not significant, AUC  $p=0.266$ ,  
640 iAUC  $p=0.1$ , Student's t test). **h**, CA7S treatment does not induce gallbladder filling in mice ( $n=8$   
641 mice per group, not significant,  $p=0.95$ , Welch's t test). **i**, Percentage cell viability upon treatment  
642 of Caco-2 cells with CA7S in vitro ( $\geq 3$  biological replicates per condition, not significant,  $p \geq 0.97$   
643 one-way ANOVA followed by Dunnett's multiple comparisons test). All data are presented as  
644 mean  $\pm$  SEM.

645

646

647 **Table 1. Cholic acid-7-sulfate concentration in indicated tissues and blood**

| Treatment              | Tissue/blood | CA7S concentration (mean $\pm$ SEM) |
|------------------------|--------------|-------------------------------------|
| DIO mice; sham surgery | Cecum        | 1726 $\pm$ 267 pmol/mg              |
|                        | Liver        | 0.12 $\pm$ 0.04 pmol/mg             |

|                                 |                |                      |
|---------------------------------|----------------|----------------------|
|                                 | Portal vein    | n.d.                 |
|                                 | Systemic blood | n.d.                 |
| DIO mice; sleeve<br>gastrectomy | Cecum          | 2661 ± 331 pmol/mg   |
|                                 | Liver          | 0.27 ± 0.04 pmol/mg  |
|                                 | Portal vein    | n.d.                 |
|                                 | Systemic blood | n.d.                 |
| DIO mice; enteral PBS           | Cecum          | 161.1 ± 46.4 pmol/mg |
|                                 | Portal vein    | 0.07 ± 0.06 pmol/mg  |
|                                 | Systemic blood | n.d.                 |
| DIO mice; enteral CA7S          | Cecum          | 2577 ± 185 pmol/mg   |
|                                 | Portal vein    | 6.13 ± 2.11 pmol/mg  |
|                                 | Systemic blood | 0.5 ± 0.2 pmol/μl    |
| DIO mice; PBS gavage            | Cecum          | 947 ± 349 pmol/mg    |
|                                 | Portal vein    | n.d.                 |
|                                 | Systemic blood | n.d.                 |
| DIO mice; CA7S gavage           | Cecum          | 14345 ± 1451 pmol/μl |
|                                 | Portal vein    | 13.2 ± 7.7 pmol/μl   |
|                                 | Systemic blood | n.d.                 |

648 n.d. not detected, all data are presented as mean ± SEM.

649

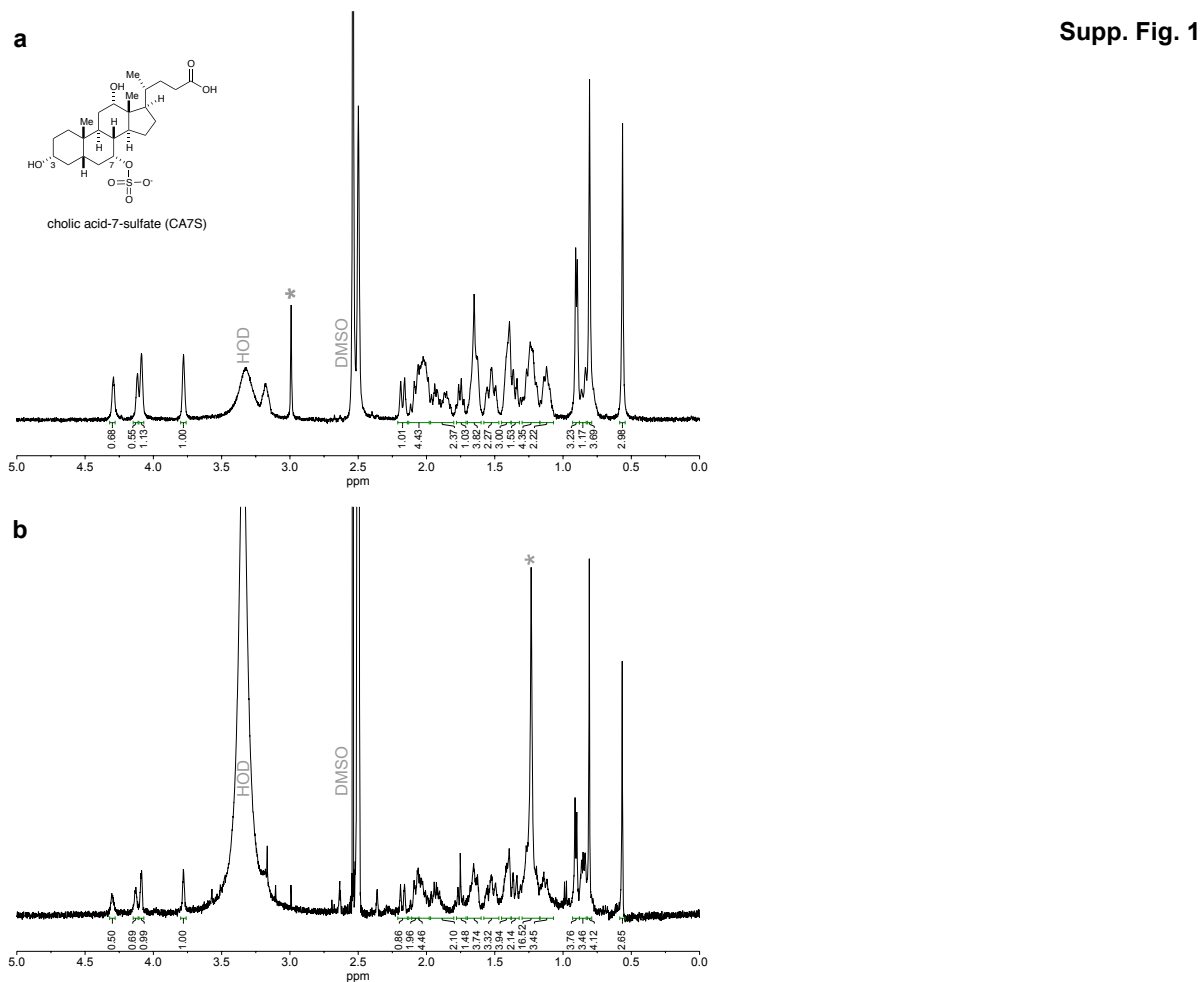

650

651 **Supplementary Figure 1. NMR of cholic acid-7-sulfate**

652 **a**,  $^1\text{H}$  NMR of authentic sample of cholic acid-7-sulfate (Cayman Chemical). **b**,  $^1\text{H}$  NMR of CA7S

653 purified from the cecal contents of SG mice. Signals between 3.7 to 4.4 ppm are diagnostic of

654 CA7S. Impurities are denoted by asterisks.

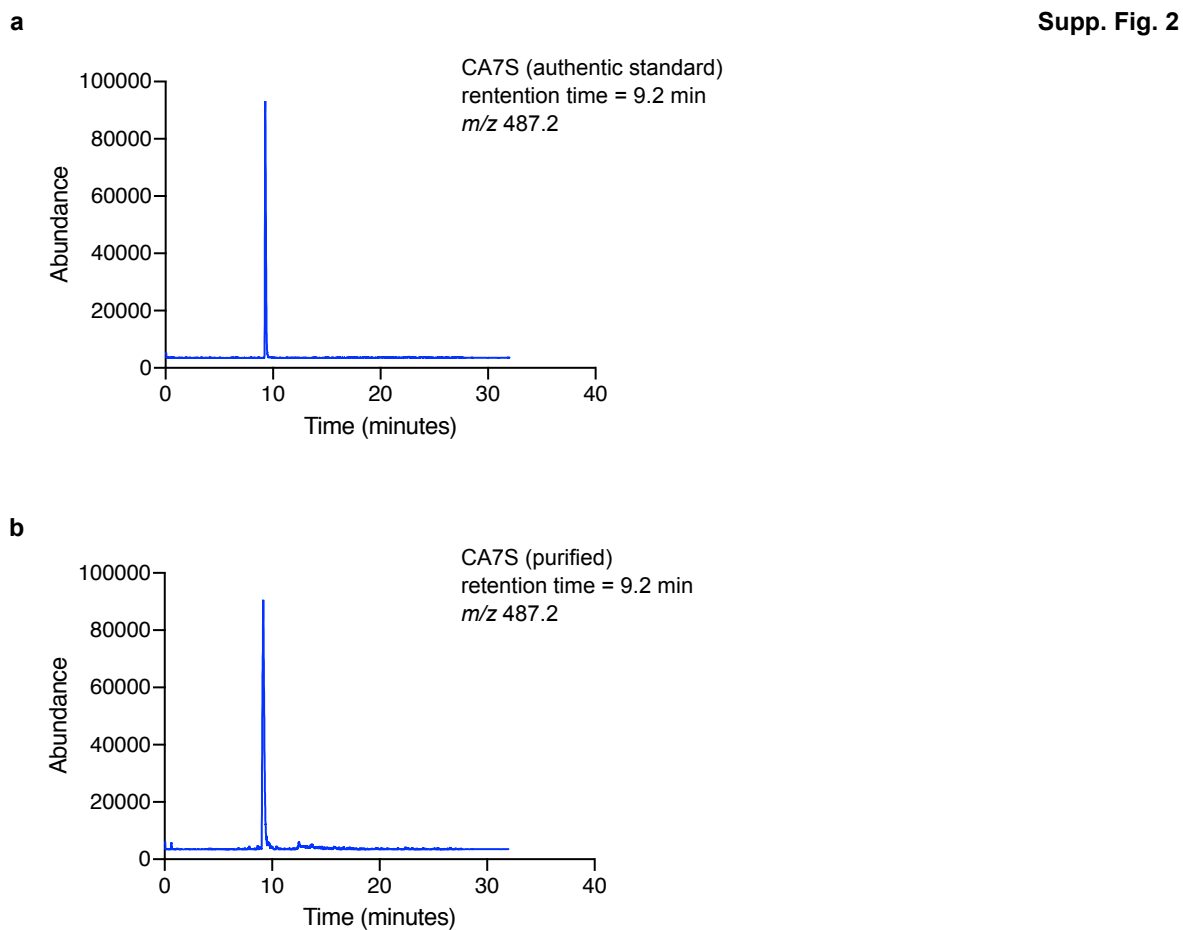

655

656 **Supplementary Figure 2. UPLC-MS analysis of cholic acid-7-sulfate**

657 **a**, Commercially available cholic acid-7-sulfate (Cayman Chemical) and **b**, CA7S purified from the

658 cecal contents of SG mice have the same mass ( $m/z$  487.2) and elute at 9.2 minutes.

Supp. Fig. 3

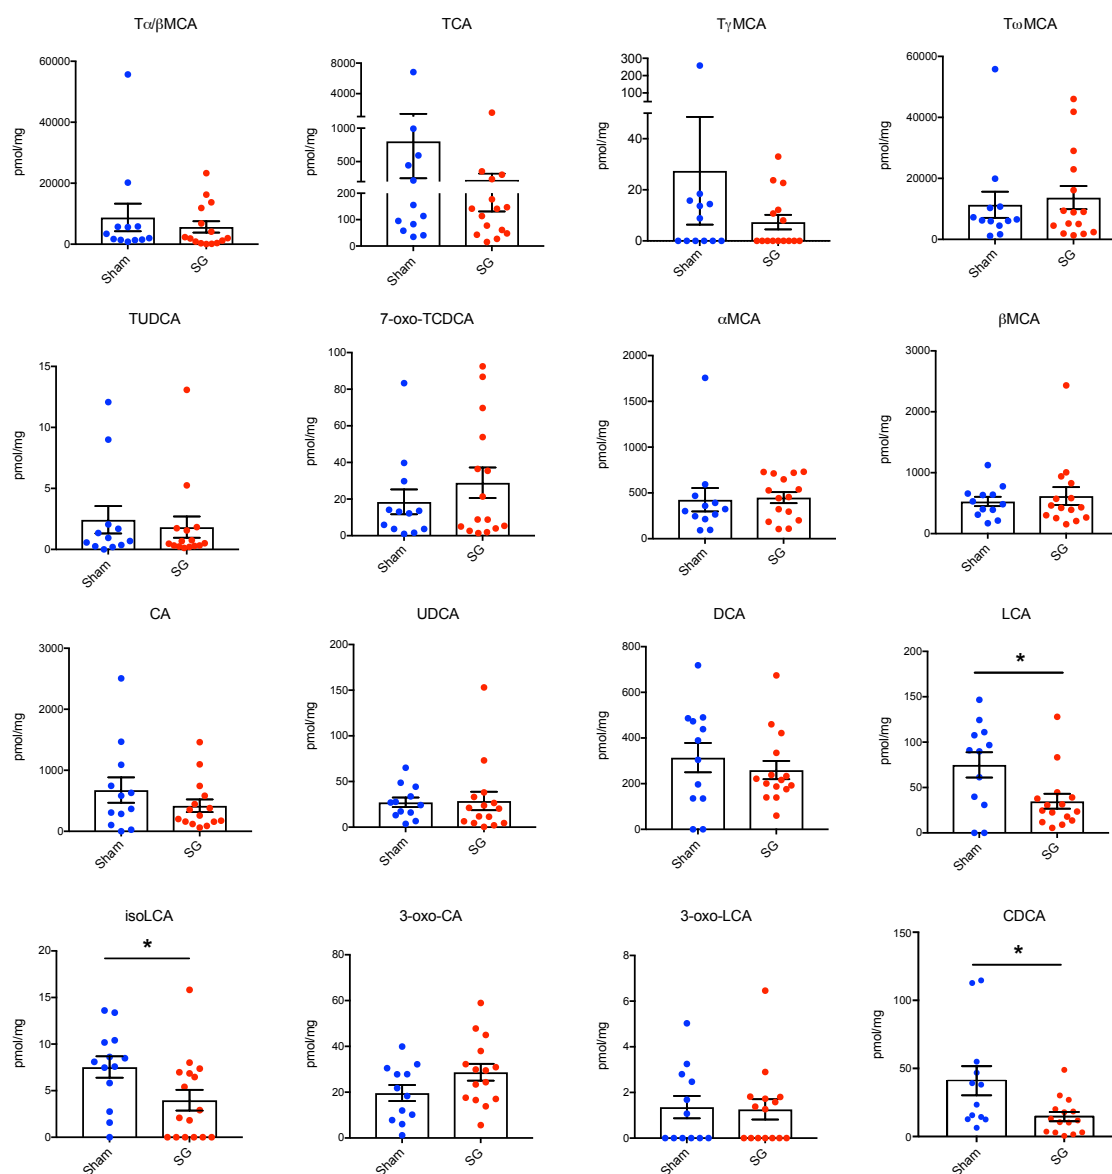

659  
 660 **Supplementary Figure 3. Bile acid concentrations in cecal contents of mice post-sham or**  
 661 **post-SG.** Cecal contents were collected from sham or SG mice 6 weeks post-op and bile acids  
 662 were quantified using UPLC-MS (sham, n=12, SG, n=15, data not marked with asterisk(s) are not  
 663 significant). All bile acids with measurable concentrations above the limit of detection are shown.  
 664 T $\alpha$ / $\beta$ MCA, tauro-alpha- and tauro-beta-muricholic acid,  $p=0.537$ ; TCA, tauro-cholic acid,  $p=0.325$ ;  
 665 T $\gamma$ MCA, tauro-gamma-muricholic acid,  $p=0.365$ ; T $\omega$ MCA, tauro-omega-muricholic acid,  $p=0.685$ ;



666 TUDCA, tauro-ursodeoxycholic acid,  $p=0.672$ ; 7-oxo-TCDC, 7-oxo-tauro-chenodeoxycholic  
667 acid  $p=0.34$ ;  $\alpha$ MCA, alpha-muricholic acid,  $p=0.874$ ;  $\beta$ MCA, beta-muricholic acid,  $p=0.595$ ; CA,  
668 cholic acid,  $p=0.287$ ; UDCA, ursodeoxycholic acid,  $p=0.854$ ; DCA, deoxycholic acid,  $p=0.481$ ;  
669 LCA, lithocholic acid,  $*p=0.023$ ; isoLCA, isolithocholic acid  $*p=0.024$ ; 3-oxo-CA, 3-oxo-cholic acid,  
670  $p=0.087$ ; 3-oxo-LCA, 3-oxo-lithocholic acid,  $p=0.793$ ; CDCA, chenodeoxycholic acid,  $*p=0.036$ ,  
671 Welch's t test. All data are presented as mean  $\pm$  SEM.

672

Supp. Fig. 4

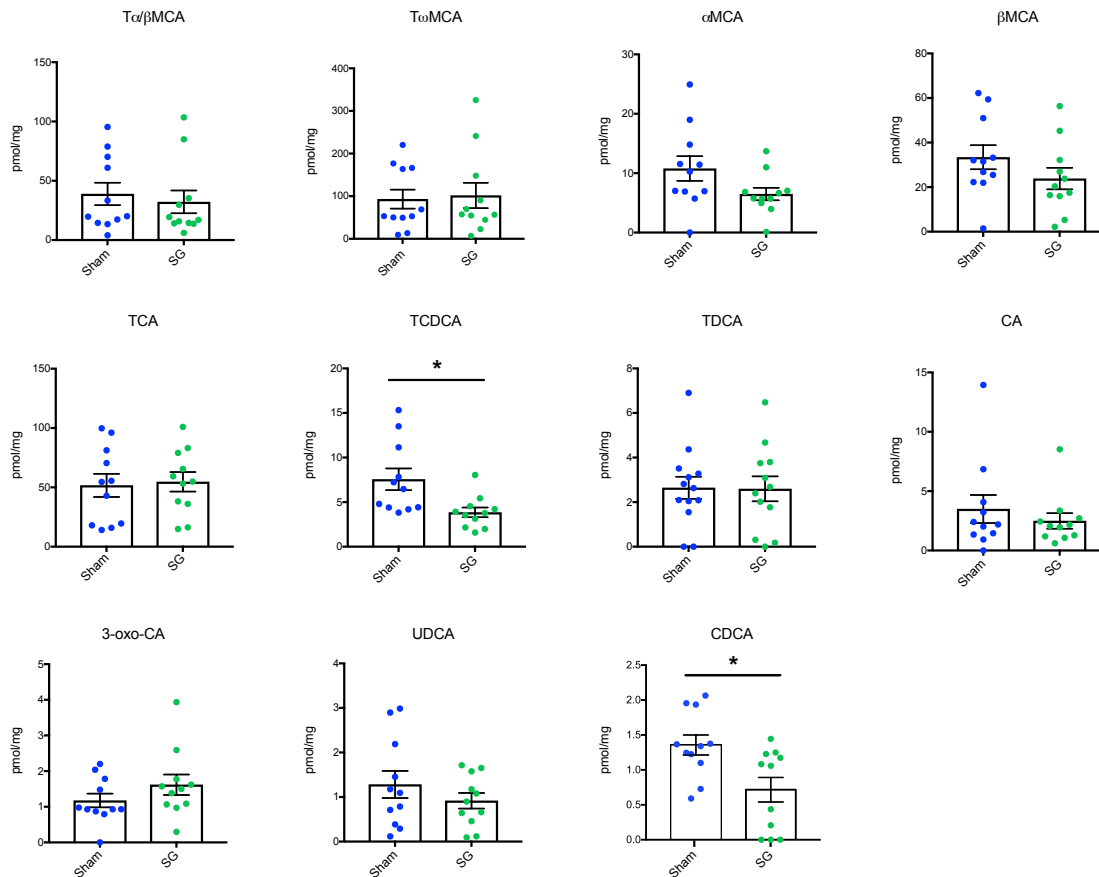

673

674 **Supplementary Figure 4. Bile acid concentrations in livers of mice post-sham or post-SG.**

675 Livers were collected from sham or SG mice 6 weeks post-op and bile acids were quantified using  
676 UPLC-MS (n=11 per group, data not marked with asterisk(s) are not significant). All bile acids  
677 with measurable concentrations above the limit of detection are shown. T $\alpha$ / $\beta$ MCA, tauro-alpha-

678 and tauro-beta-muricholic acid,  $p=0.625$ ; T $\omega$ MCA, tauro-omega-muricholic acid,  $p=0.822$ ;  $\alpha$ MCA,  
679 alpha-muricholic acid,  $p=0.085$ ;  $\beta$ MCA, beta-muricholic acid,  $p=0.203$ ; TCA, tauro-cholic acid,  
680  $p=0.815$ ; TCDCA, tauro-chenodeoxycholic acid,  $*p=0.015$ ; TDCA, tauro-deoxycholic acid,  
681  $p=0.947$ ; CA, cholic acid,  $p=0.468$ ; 3-oxo-CA, 3-oxo-cholic acid,  $p=0.22$ ; UDCA, ursodeoxycholic  
682 acid,  $p=0.314$ ; CDCA, chenodeoxycholic acid,  $*p=0.023$ , Welch's t test. All data are presented as  
683 mean  $\pm$  SEM.

684

Supp. Fig. 5

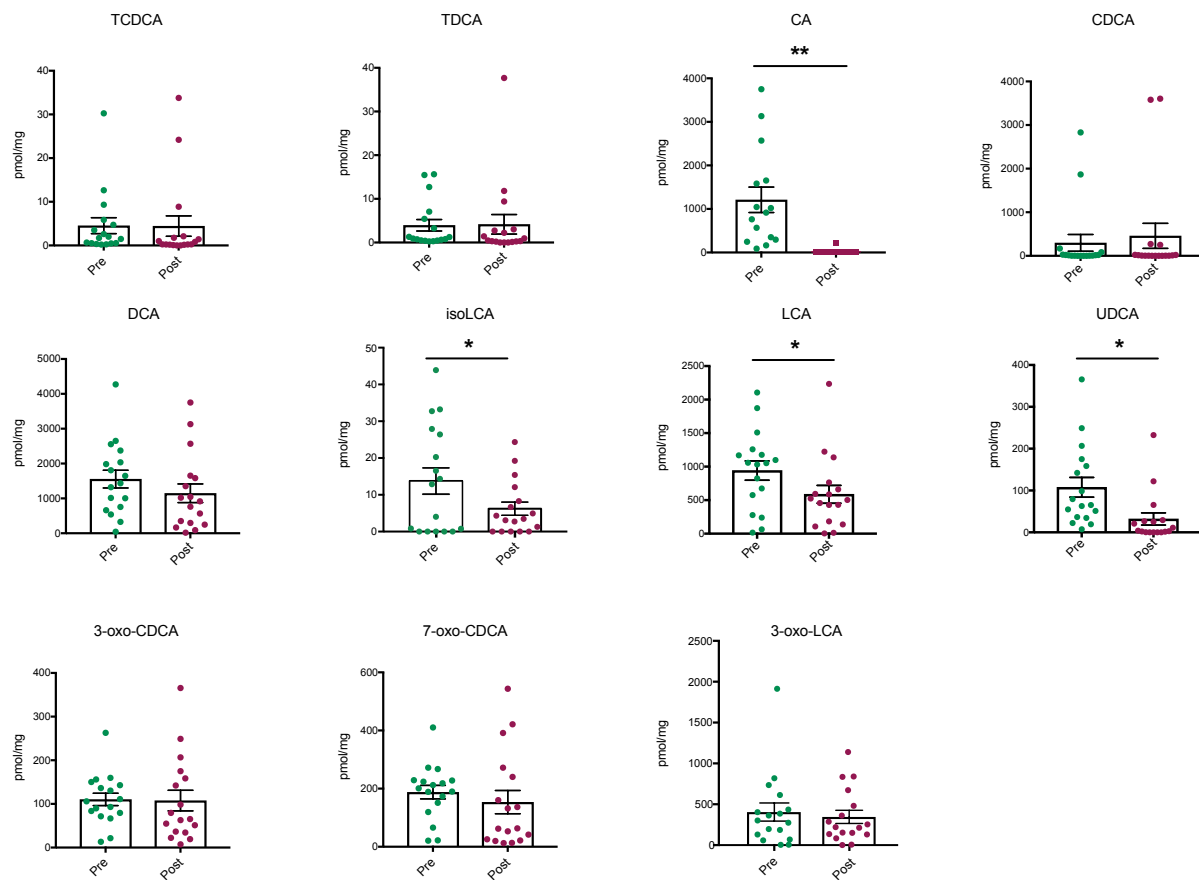

685

686 **Supplementary Figure 5. Bile acid concentrations in feces of human patients pre-SG or**  
687 **post-SG.**

688 Feces were collected from patients pre-op or ~5 weeks post-op and bile acids were quantified  
689 using UPLC-MS (n=17 patients, median 36 days after surgery, data not marked with asterisk(s)  
690 are not significant). All bile acids with measurable concentrations above the limit of detection are  
691 shown. TCDCA, tauro-chenodeoxycholic acid,  $p=0.973$ ; TDCA, tauro-deoxycholic acid,  $p=0.933$ ;  
692 CA, cholic acid,  $**p=0.001$ ; CDCA, chenodeoxycholic acid,  $p=0.525$ ; DCA, deoxycholic acid,  
693  $p=0.135$ ; LCA, lithocholic acid,  $*p=0.014$ ; isoLCA, iso-lithocholic acid,  $*p=0.032$ ; UDCA,  
694 ursodeoxycholic acid,  $*p=0.022$ ; 3-oxo-CDCA, 3-oxo-chenodeoxycholic acid,  $p=0.921$ ; 7-oxo-  
695 CDCA, 7-oxo-chenodeoxycholic acid,  $p=0.477$ , 3-oxo-LCA, 3-oxo-lithocholic acid,  $p=0.563$ ,  
696 paired t test. All data are presented as mean  $\pm$  SEM.  
697

Supp. Fig. 6

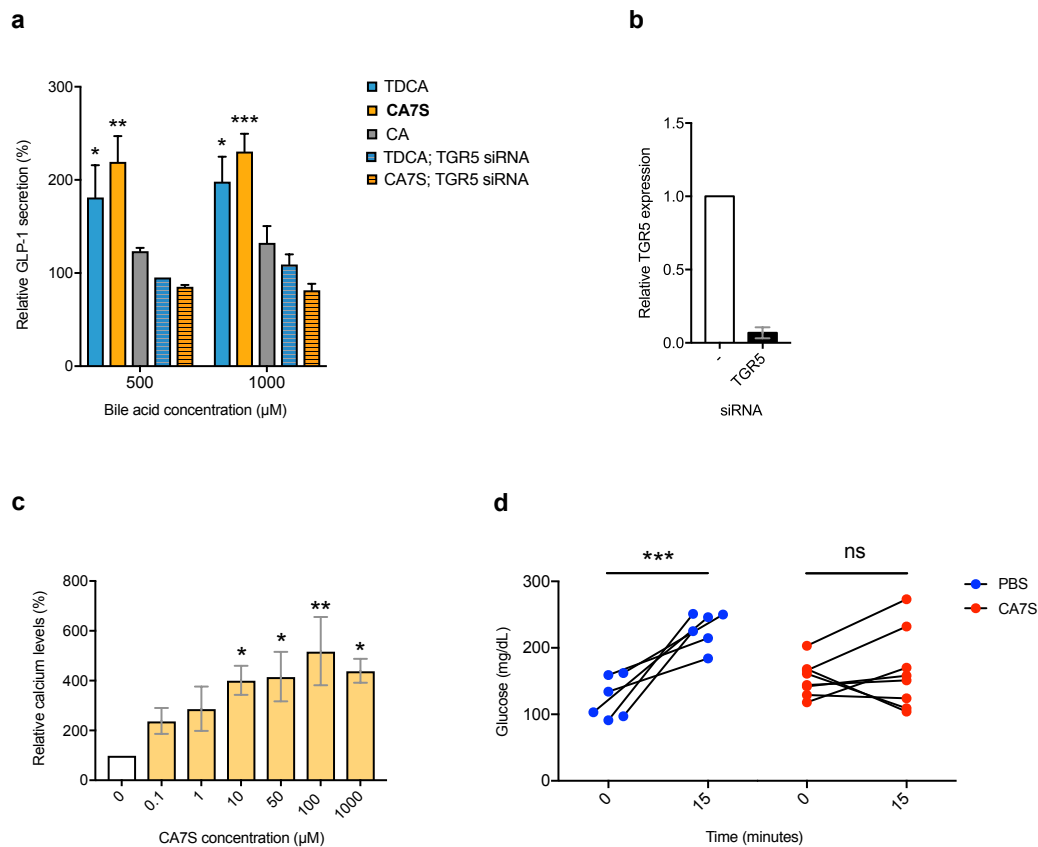

698

699 **Supplementary Figure 6. CA7S activates TGR5, induces GLP-1 secretion, and reduces**  
700 **systemic glucose levels**

701 **a**, CA7S induced secretion of GLP-1 in NCI-H716 cells compared to both CA and the known  
702 TGR5 agonist, TDCA. siRNA-mediated knockdown of TGR5 abolished GLP-1 secretion ( $\geq 3$   
703 biological replicates per condition,  $*p=0.027-0.04$ ,  $**p=0.003$ ,  $***p=0.0007$ , one-way ANOVA  
704 followed by Dunnett's multiple comparisons test). **b**, Quantitative real time PCR analysis of  
705 expression of human TGR5 in TGR5 siRNA and negative (-) siRNA-treated NCI-H716 cells for  
706 Fig. 2g and Supplementary Fig. 6a. **c**, CA7S induced an increase in intracellular calcium levels in  
707 NCI-H716 cells ( $\geq 3$  biological replicates per condition,  $*p=0.018-0.041$ ,  $**p=0.003$ , one-way  
708 ANOVA followed by Dunnett's multiple comparisons test). **d**, In vivo change in serum glucose  
709 upon treatment with PBS and CA7S (PBS,  $n=6$ ; CA7S,  $n=8$  mice per group,  $***p=0.0001$ , ns=not  
710 significant  $p=0.63$ , paired t test). All data are presented as mean  $\pm$  SEM.

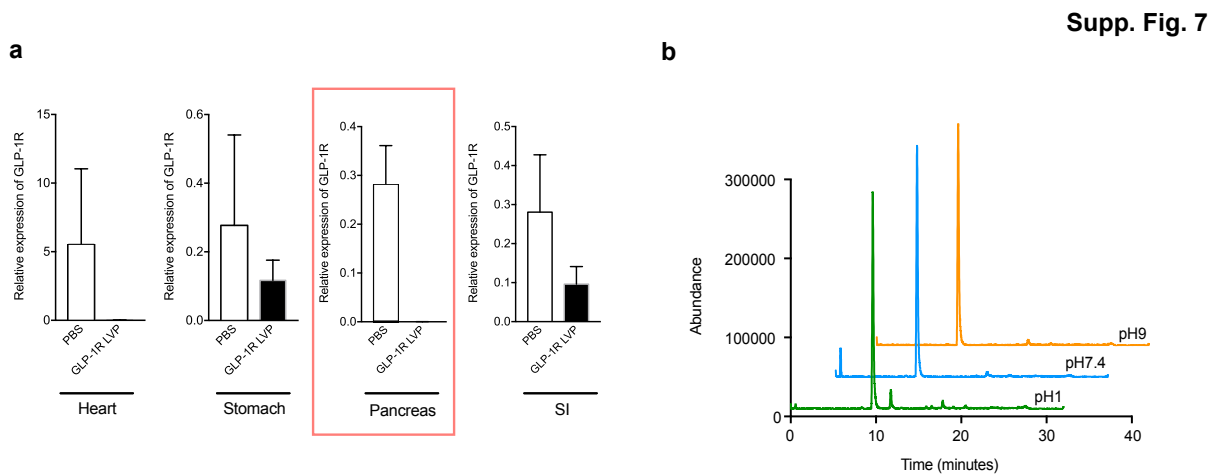

711  
712 **Supplementary Figure 7. GLP-1R shRNA knockdown efficiency and stability of CA7S**  
713 **a**, Quantitative real time PCR analysis in mice corresponding to Fig. 4f and 4g. Animals were  
714 injected with lentiviral shRNA targeting GLP-1R or PBS. Expression of mouse GLP-1R in  
715 indicated tissues of mice was measured following OGTT, which was performed 3 days post-  
716 injection (SI = small intestine, PBS,  $n=2$ ; GLP-1R LVP shRNA  $n=14$ ). **b**, UPLC-MS traces of CA7S

717 after incubation at 37 °C in buffer at the indicated physiological pHs. All data are presented as

718 mean  $\pm$  SEM.

719
